# Supplementary material for: A superoxide anion radical-activatable Golgi-targeting prodrug-based albumin complex for synergistic chemo-immunotherapy of triple-negative breast cancer
Source: Royal Society of Chemistry journal article supplement (doi:10.1039/d5tb01965f), 2025-12-24
Supplement: d5tb01965f1.pdf [file d5tb01965f1.pdf]

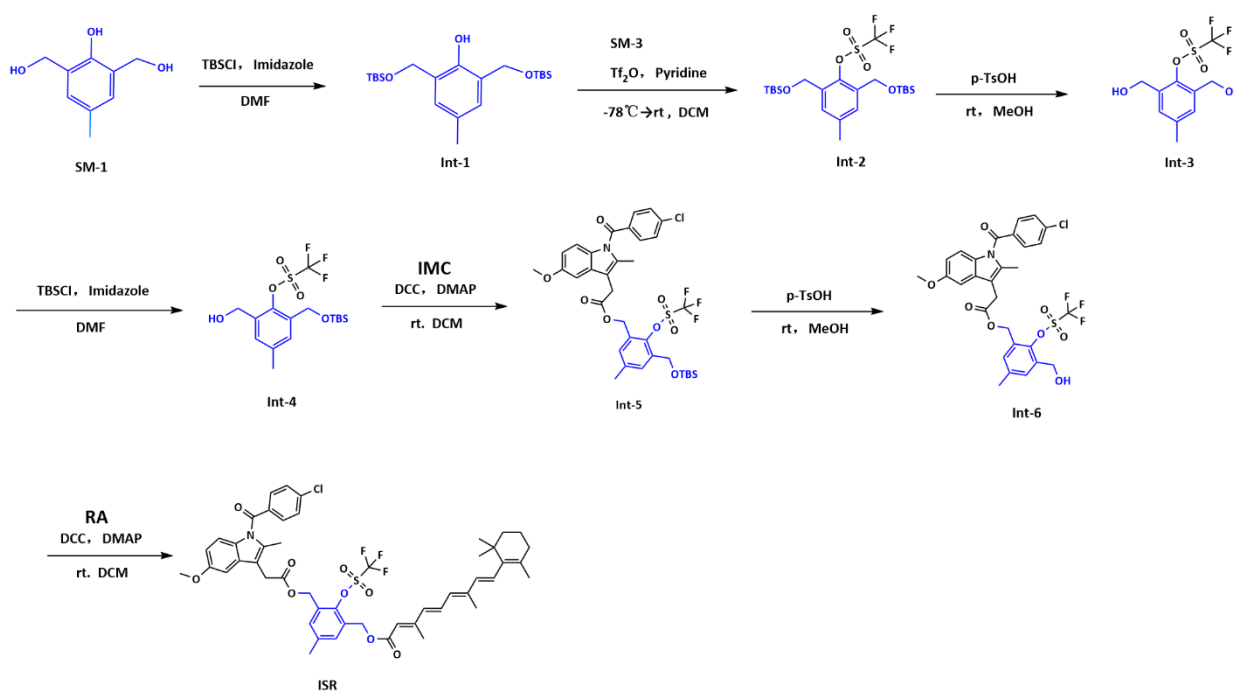

**Scheme S1** The synthetic route of ISR.

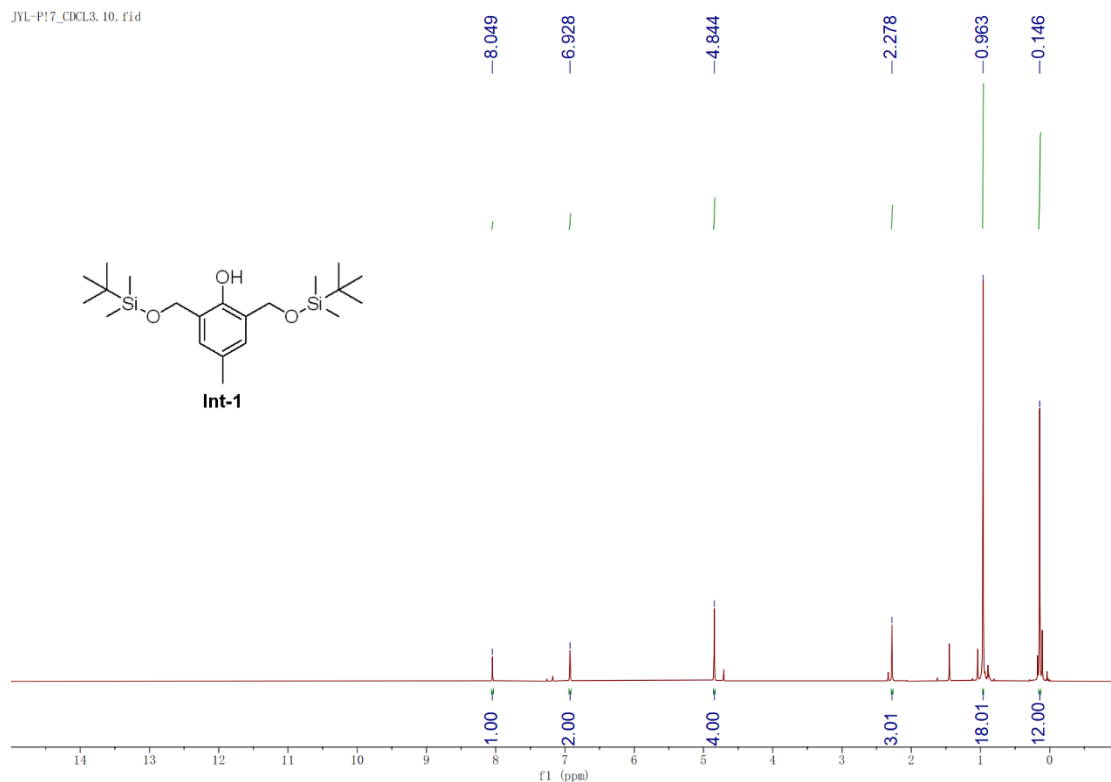

**Figure S1**  $^1\text{H}$  NMR spectrum of Int-1.

JYL-P27-H1-CDCl3, 10, fid

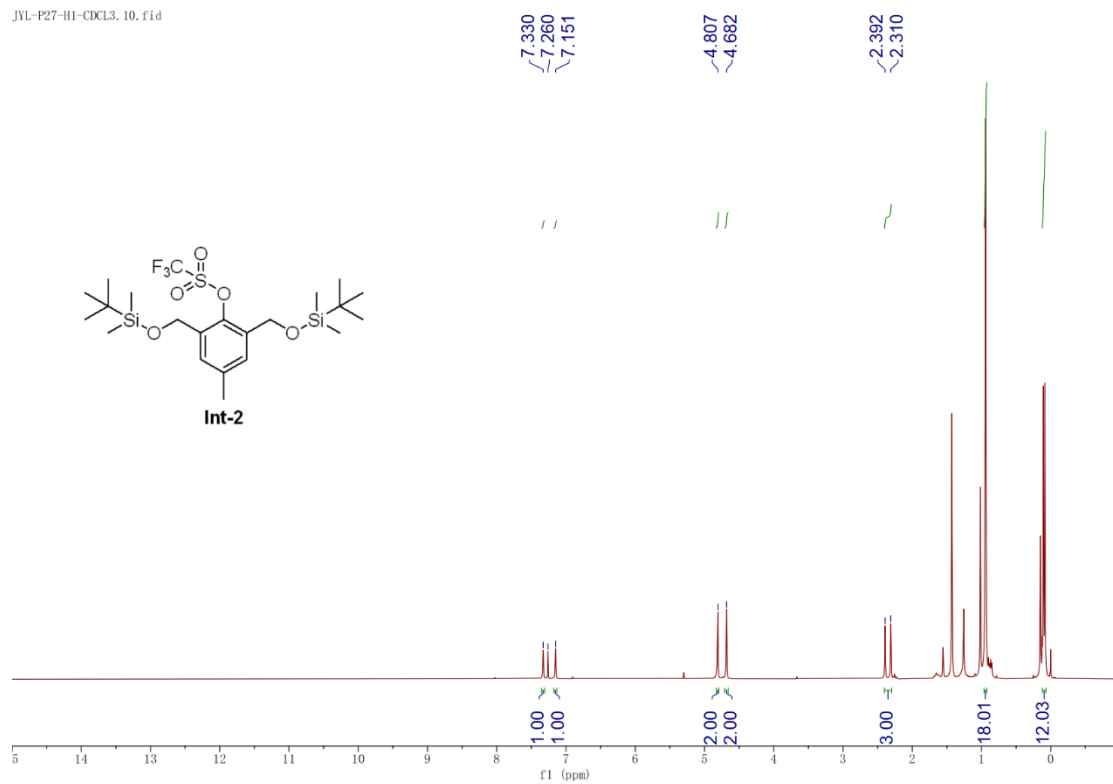

Figure S2 <sup>1</sup>H NMR spectrum of Int-2.

JYL-P29-CDCl3, 10, fid

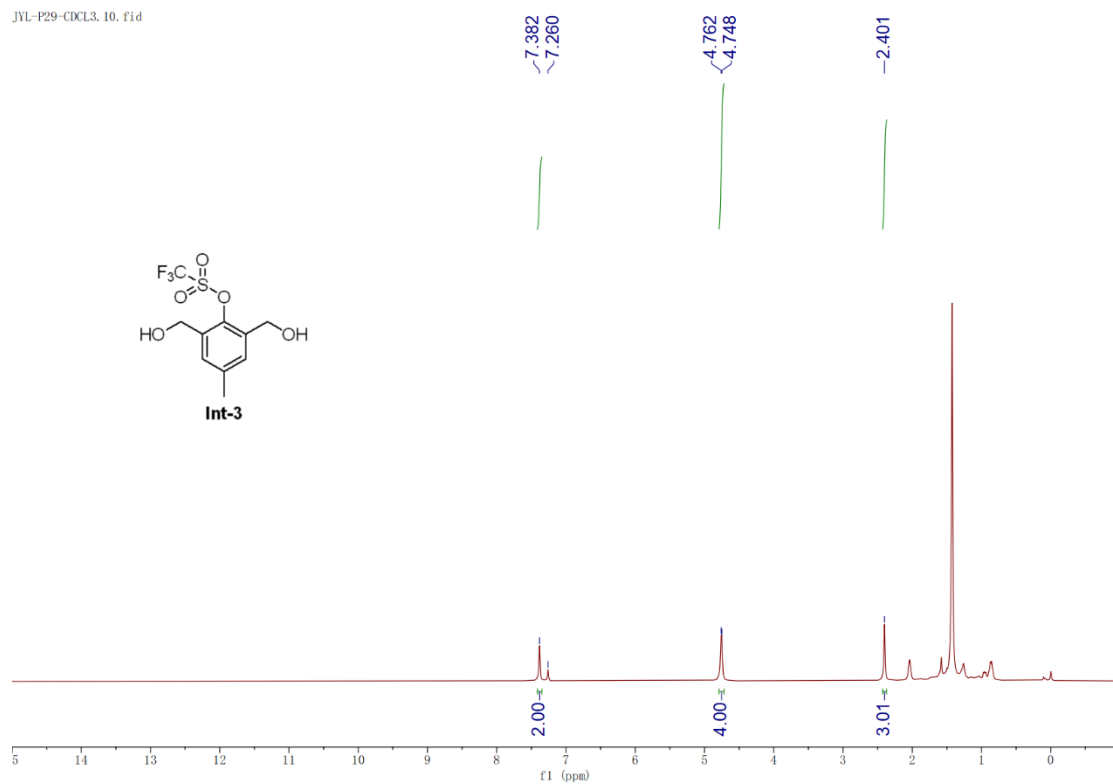

Figure S3 <sup>1</sup>H NMR spectrum of Int-3.

JYL-P30-1H-CDCL3, 10, F1d

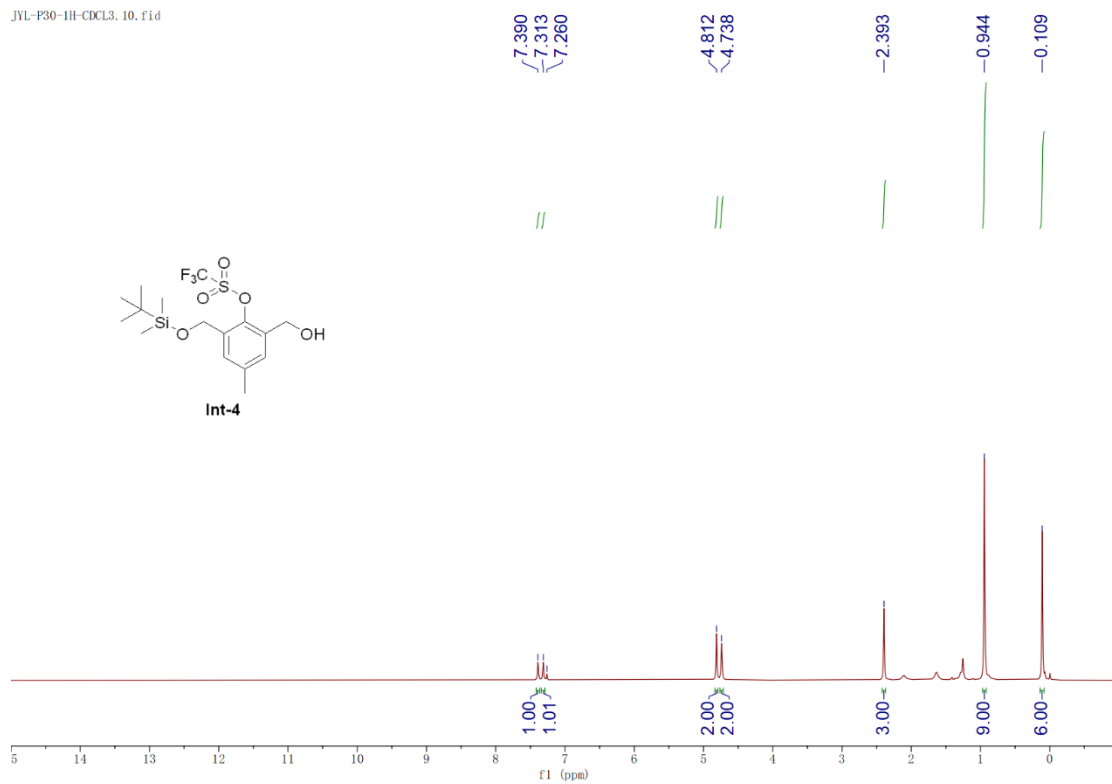

Figure S4 <sup>1</sup>H NMR spectrum of Int-4.

JYL-P32-1H-CDCL3, 10, F1d

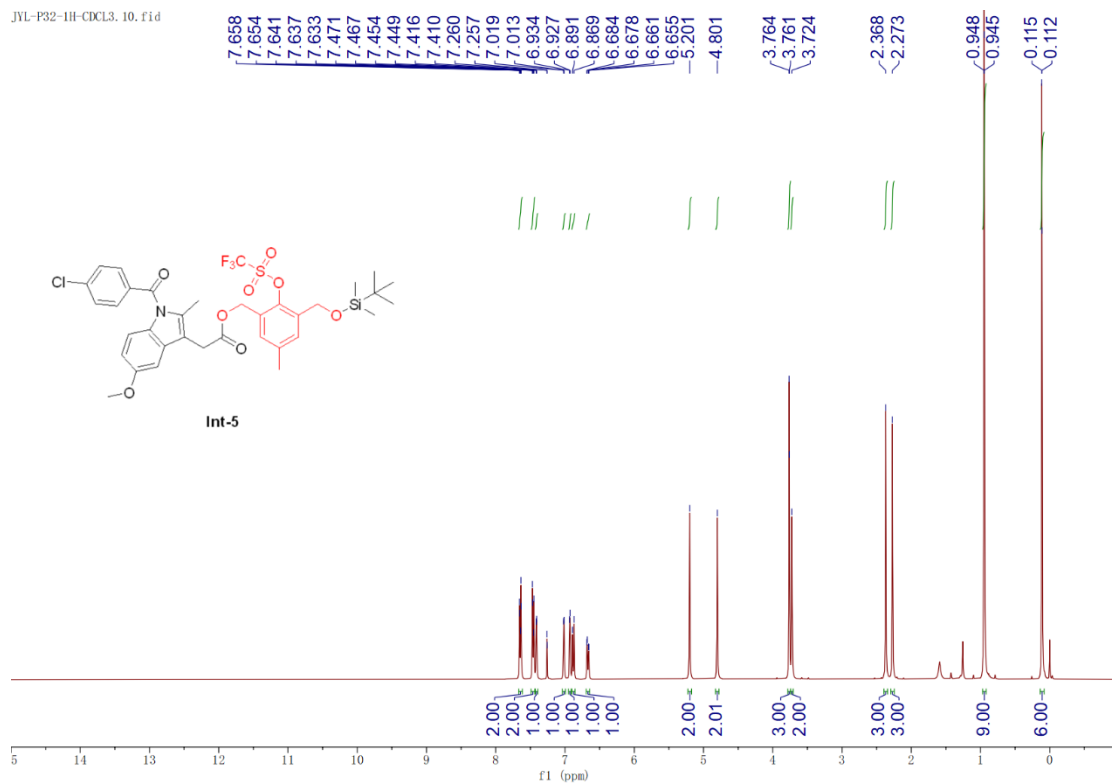

Figure S5 <sup>1</sup>H NMR spectrum of Int-5.

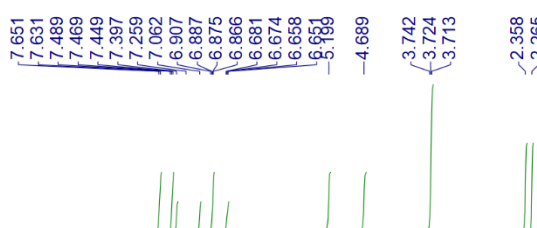

**Figure S6**  $^1\text{H}$  NMR spectrum of Int-6.

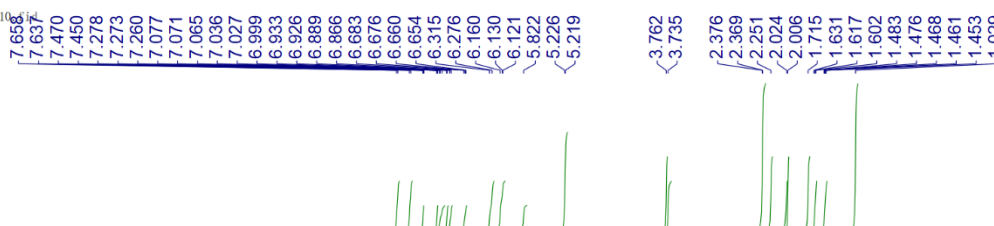

**Figure S7**  $^1\text{H}$  NMR spectrum of ISR.

JYL-P29-CDCL3-C13-202401.10.fid

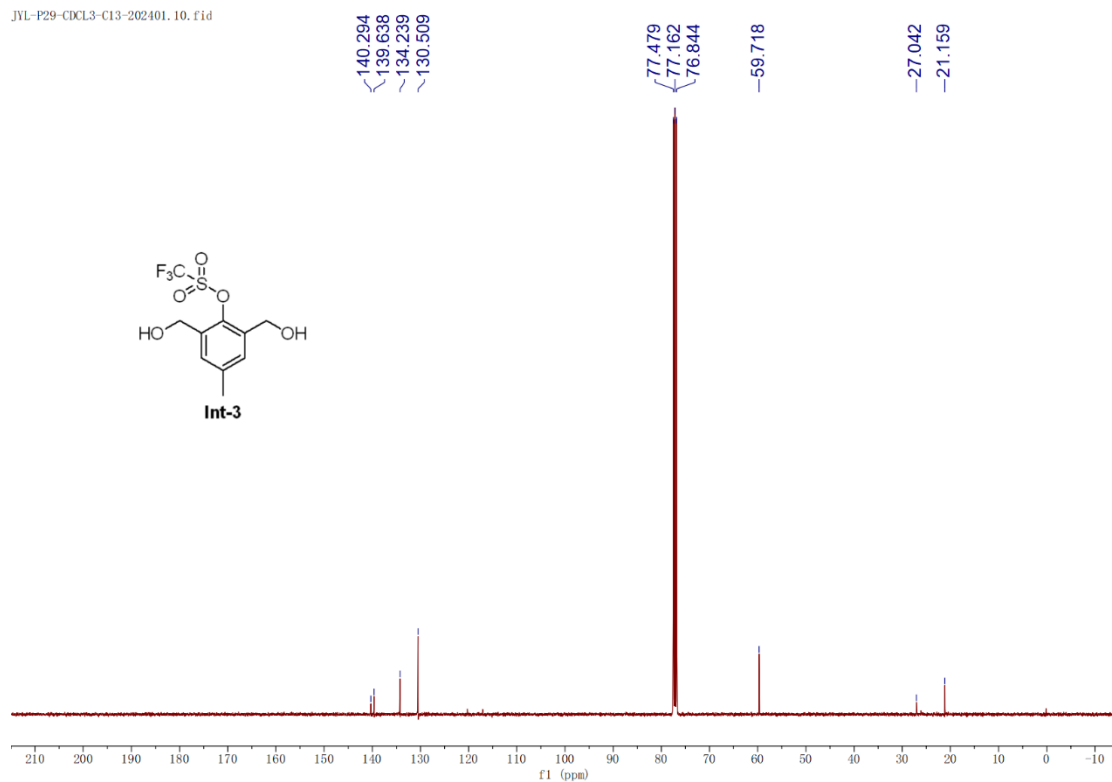

Figure S8. <sup>13</sup>C NMR spectrum of Int-3.

JYL-P30-CDCL3-C13-202401.10.fid

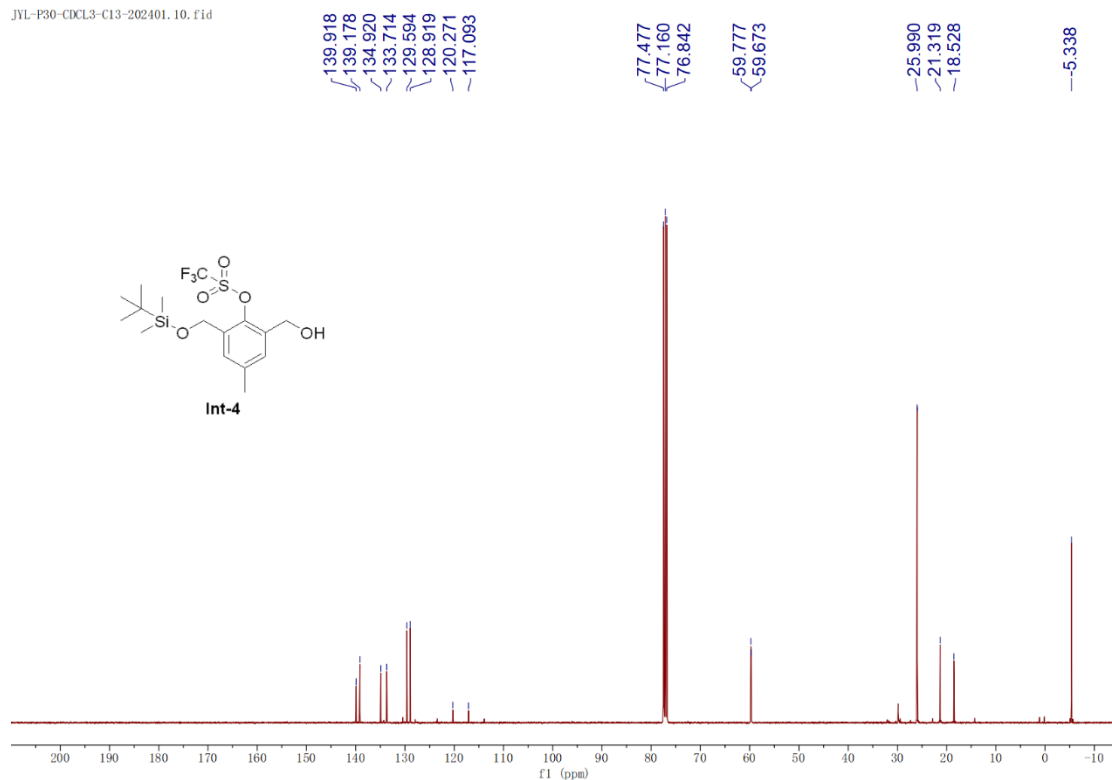

Figure S9 <sup>13</sup>C NMR spectrum of Int-4.

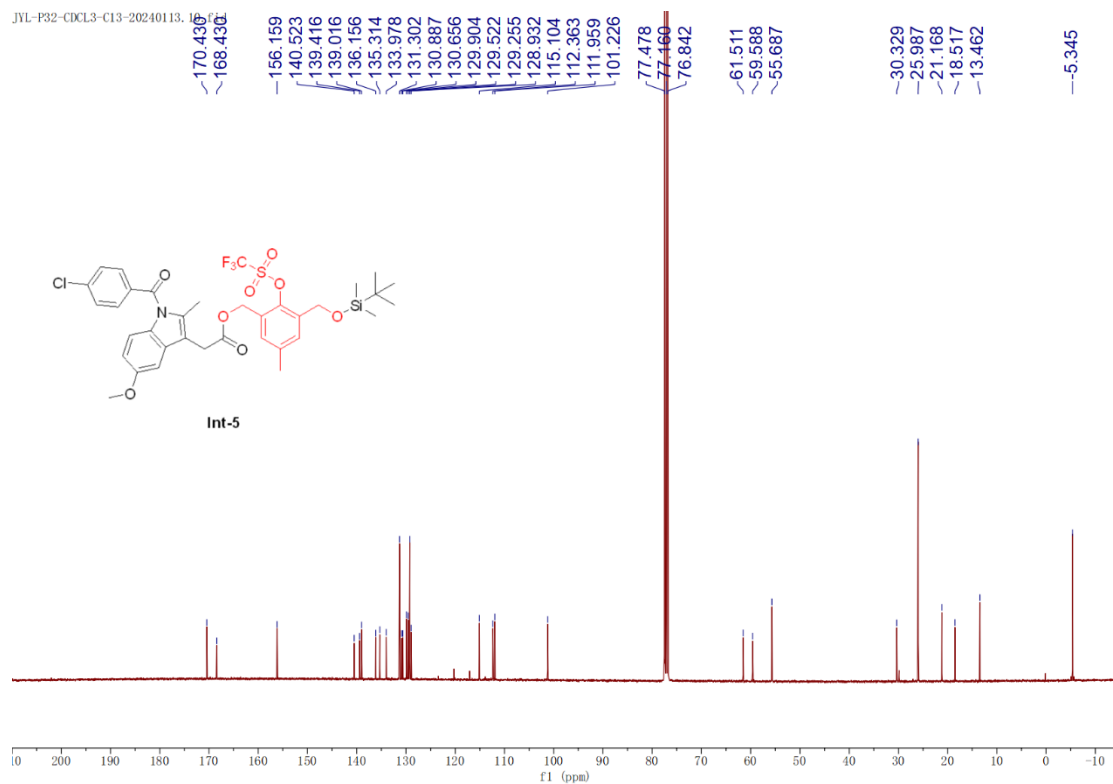

Figure S10  $^{13}\text{C}$  NMR spectrum of Int-5.

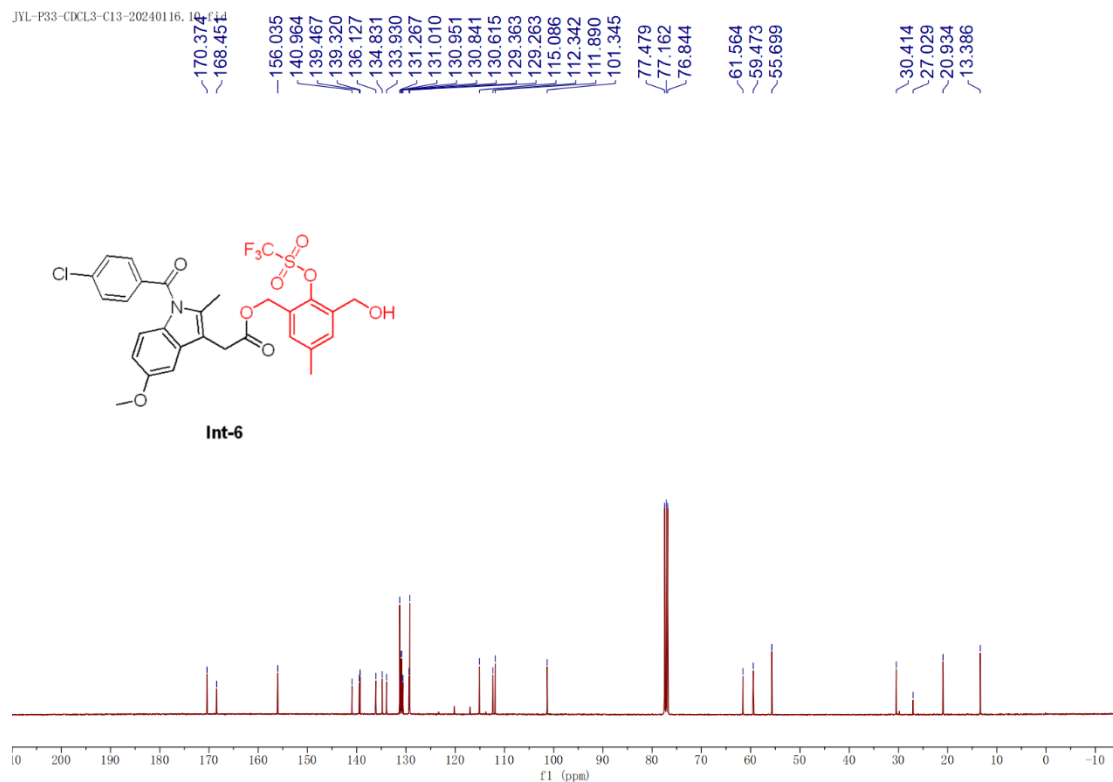

Figure S11  $^{13}\text{C}$  NMR spectrum of Int-6.

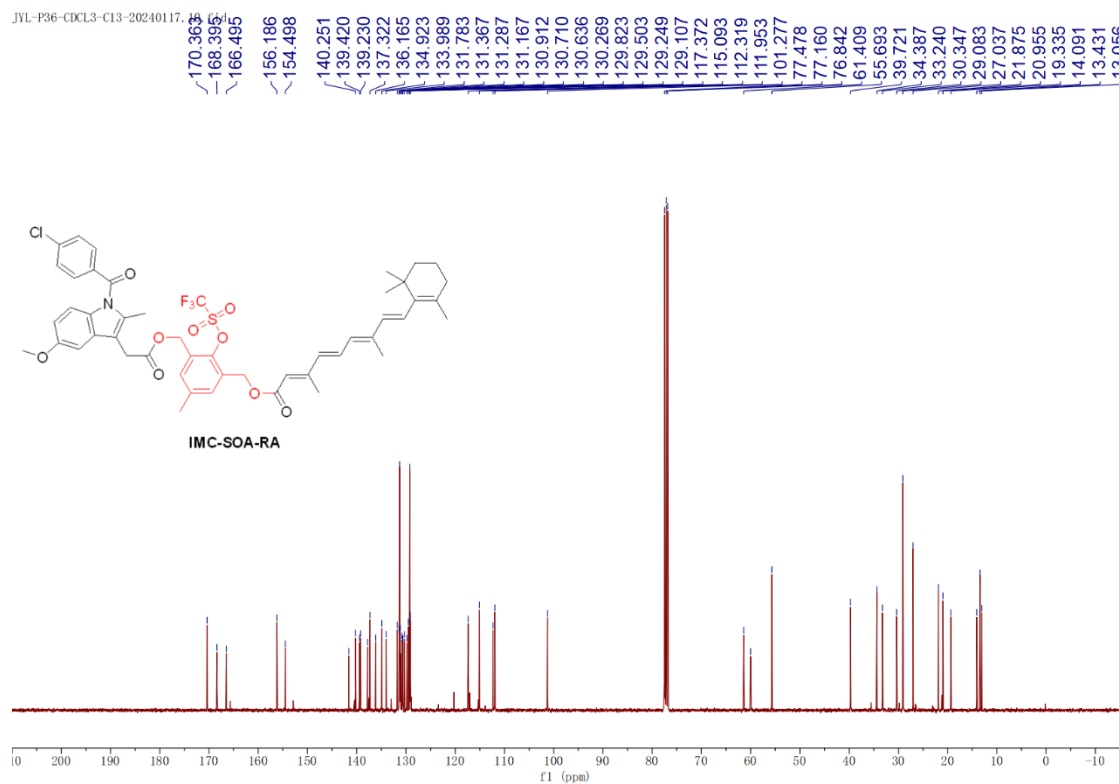

Figure S12 <sup>13</sup>C NMR spectrum of ISR.

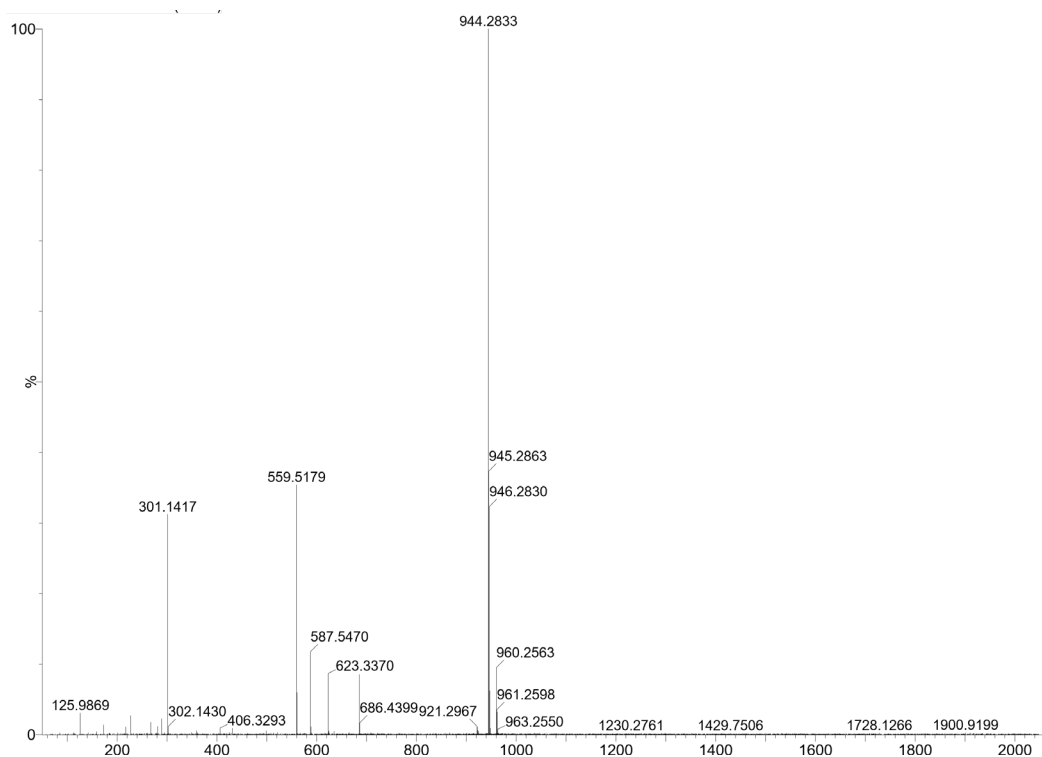

Figure S13 High resolution mass spectrum of ISR.

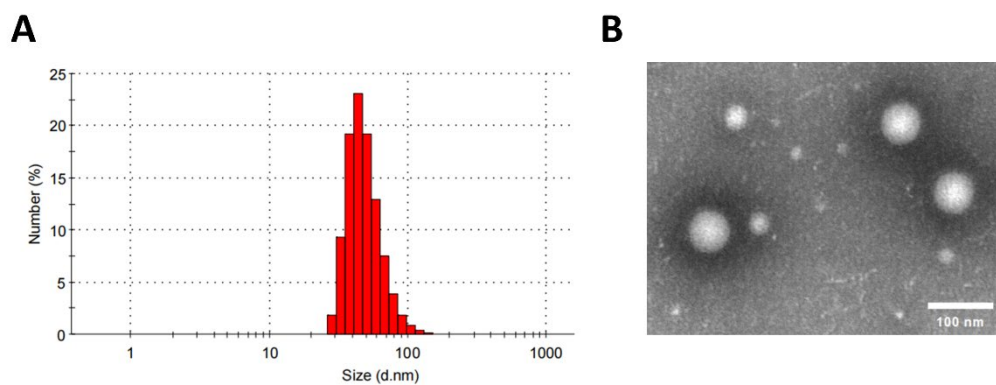

**Figure S14** Size and TEM of DOX-ISR@HSA-DSPE. Scale bar: 100 nm.

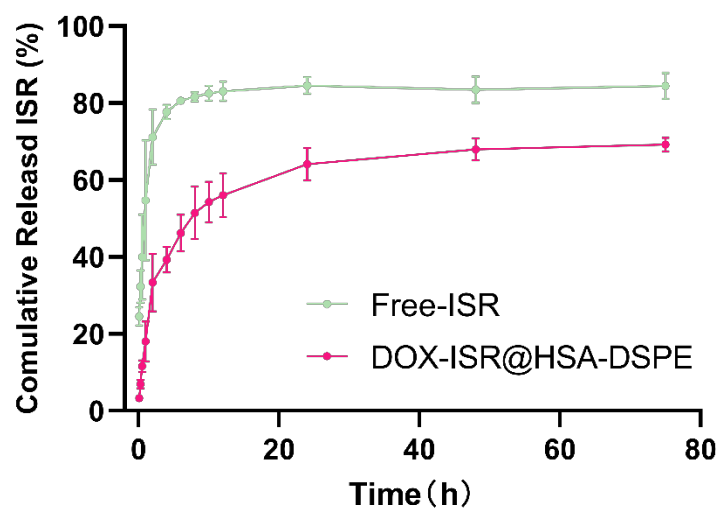

**Figure S15** Schematic of ISR release profiles of Free-ISR and DOX-ISR@HSA-DSPE ( $n = 5$ ). Data are mean  $\pm$ SD.



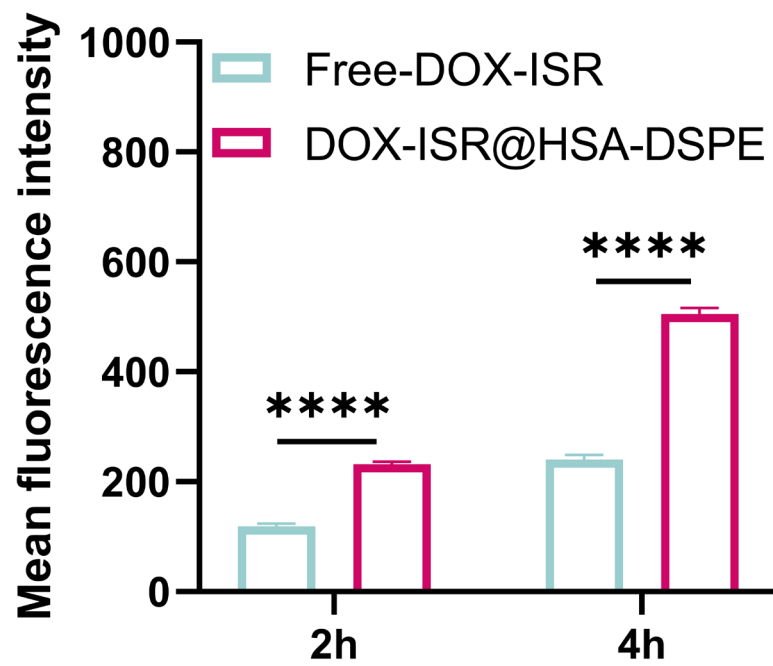

Figure S16 Statistical analysis of flow cytometry results ( $n = 3$ ). Data are mean  $\pm$ SD. \*\*\*\* $p < 0.0001$ .

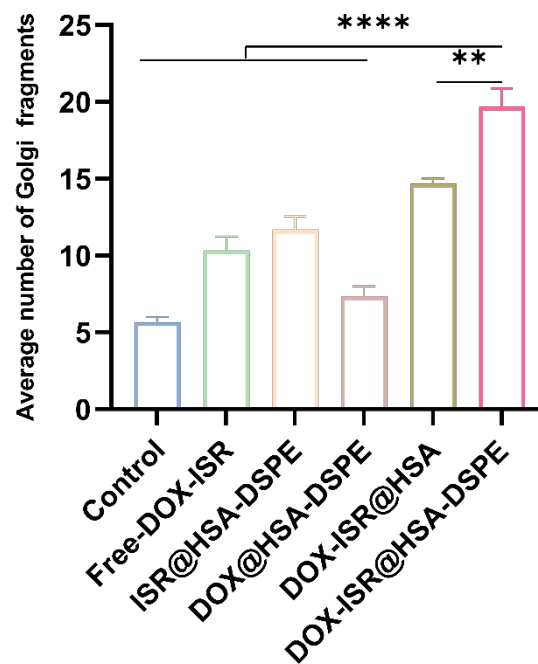

Figure S17 Quantification of Golgi fragments in 4T1 cells after different treatments by Image J ( $n = 3$ ). Data are mean  $\pm$ SD; \*\* $p < 0.01$ , \*\*\*\* $p < 0.0001$ .

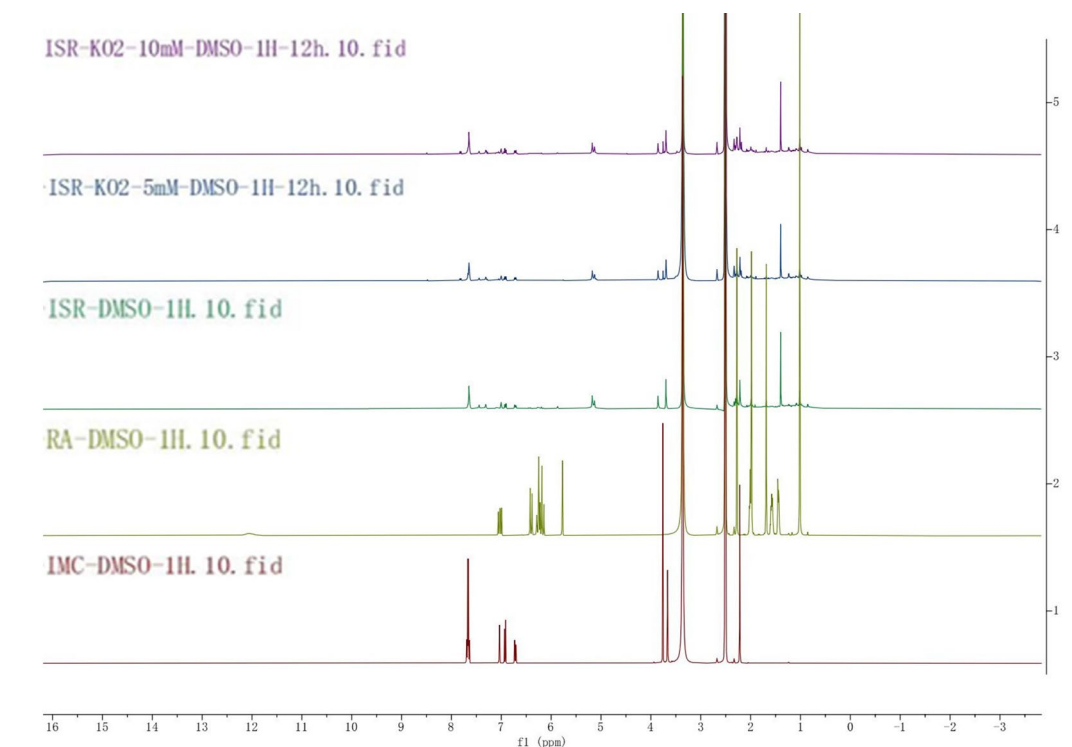

**Figure S18**  $^1\text{H}$  NMR spectra demonstrating ISR prodrug conversion to IMC and RA upon activation.

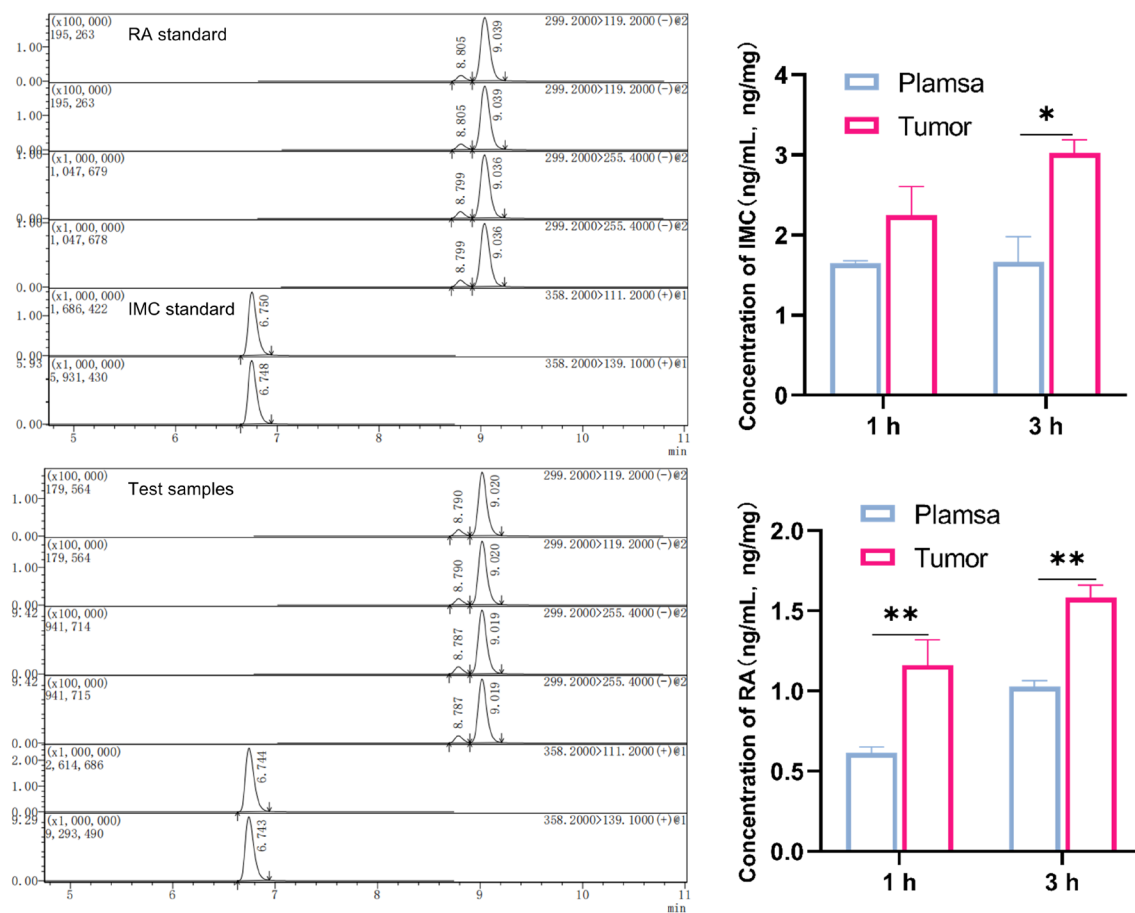

**Figure S19** Post-Administration ISR Conversion to IMC and RA (LC-MS).

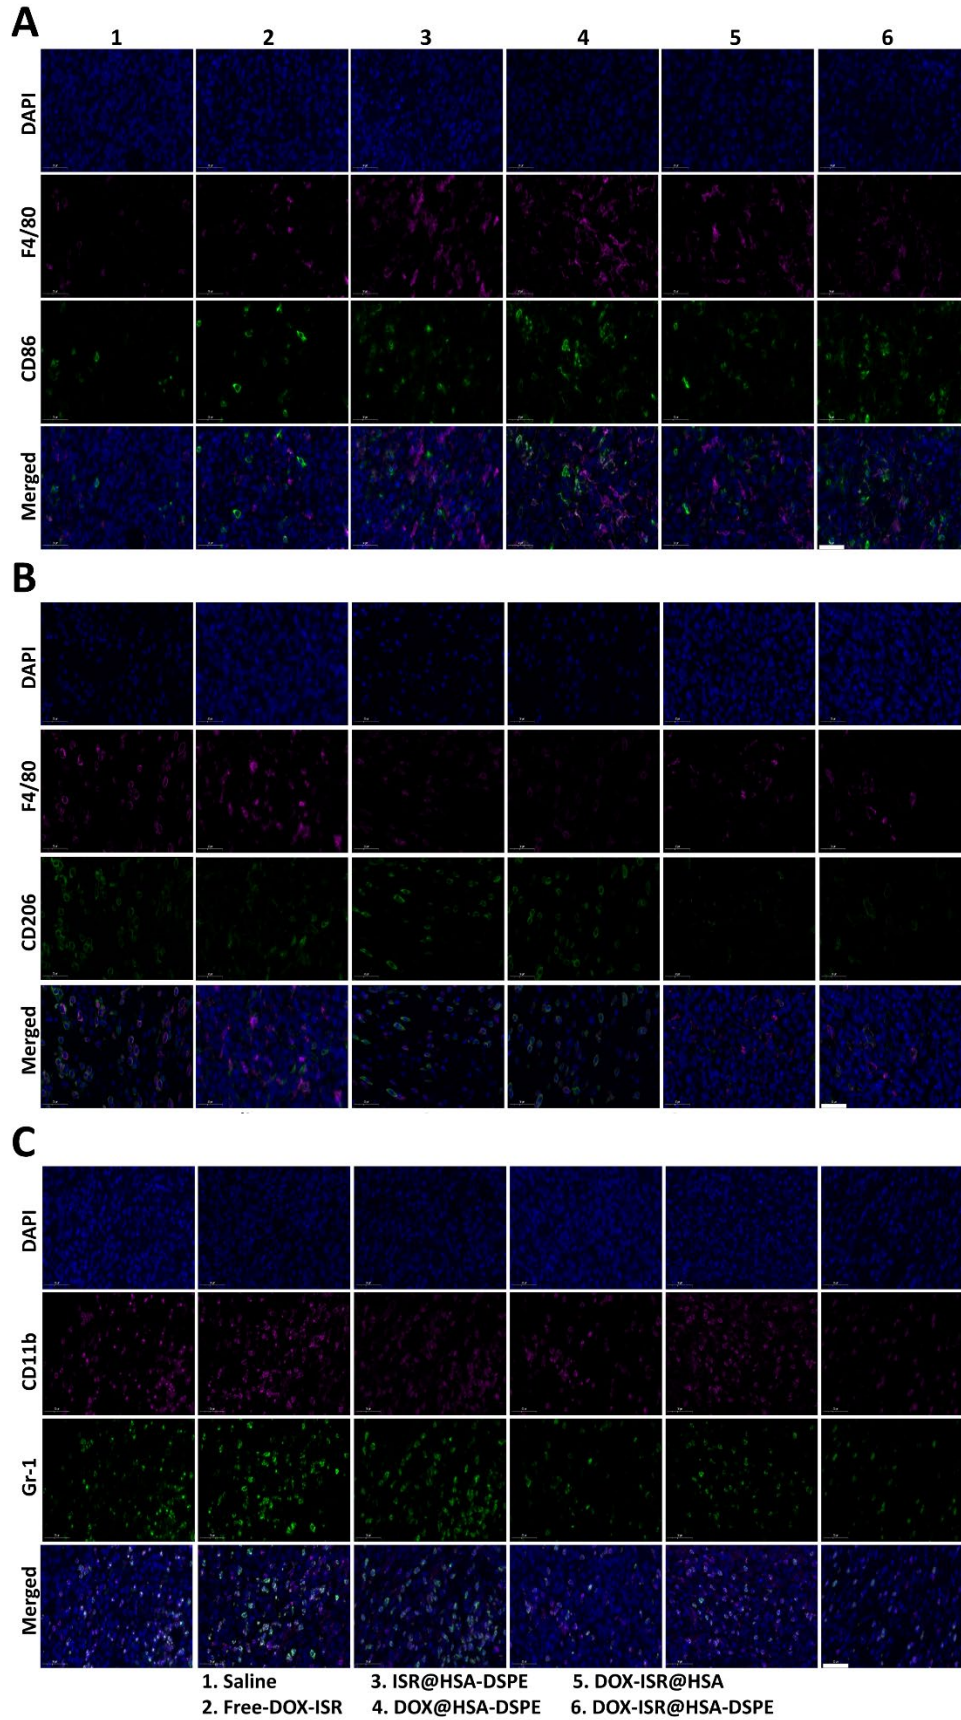

**Figure S20** (A)F4/80<sup>+</sup> and CD86<sup>+</sup> staining of tumor tissues in each group (B)F4/80<sup>+</sup> and CD206<sup>+</sup> staining of tumor tissues in each group (C)CD11b<sup>+</sup> and Gr-1<sup>+</sup> staining of tumor tissues in each group, scale bar: 50  $\mu$ m.

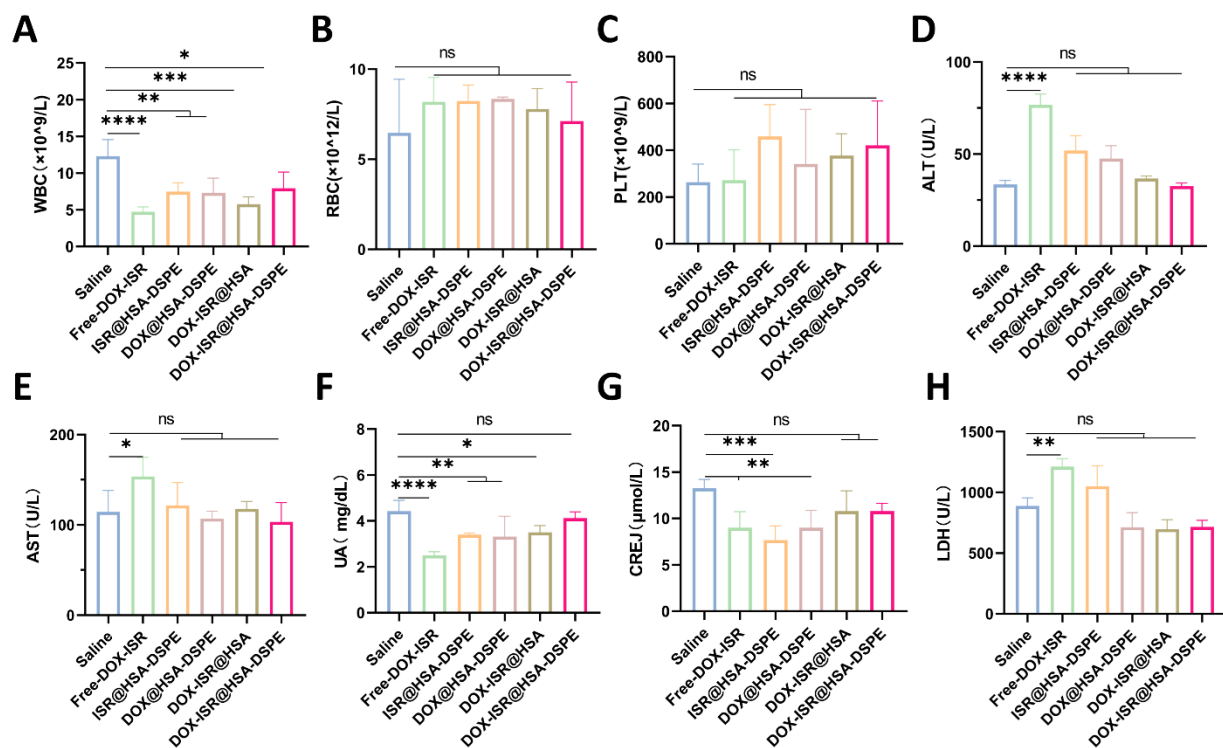

**Figure S21** (A)-(C) Quantitative analysis of WBC (A), RBC (B), PLT (C) contents in mice ( $n = 5$ ). (D)-(H) Blood biochemical analysis of the mice serum. ALT (D), AST (E), UA (F), CREJ (G), LDH (H) content quantitative determination results ( $n = 5$ ). Data are mean  $\pm$  SD; \* $p < 0.05$ , \*\* $p < 0.01$ , \*\*\* $p < 0.001$ , \*\*\*\* $p < 0.0001$ , ns, not significant.
